# Supplementary material for: Genome-wide association study of cassava brown streak disease resistance in cassava germplasm conserved in South America
Source: PubMed Central journal article supplement — Sci Rep. 2024 Oct 4;14:23141. doi: 10.1038/s41598-024-74161-6 (PMC11452518; doi:10.1038/s41598-024-74161-6), 2024-10-04
Supplement: 41598_2024_74161_MOESM1_ESM.pdf [file 41598_2024_74161_MOESM1_ESM.pdf]

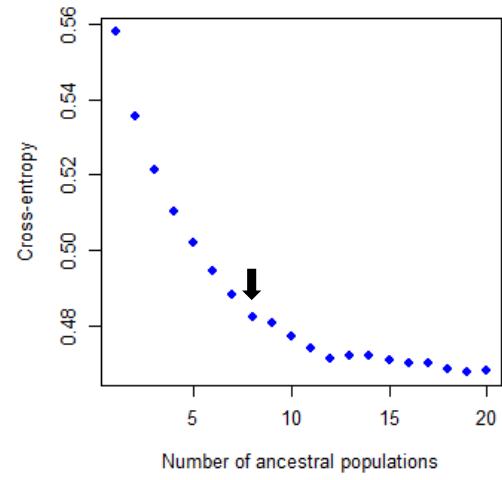

**Supplementary Figure 1.** Cross-entropy criterion as a function of the number of populations using snmf suggesting eight clusters.

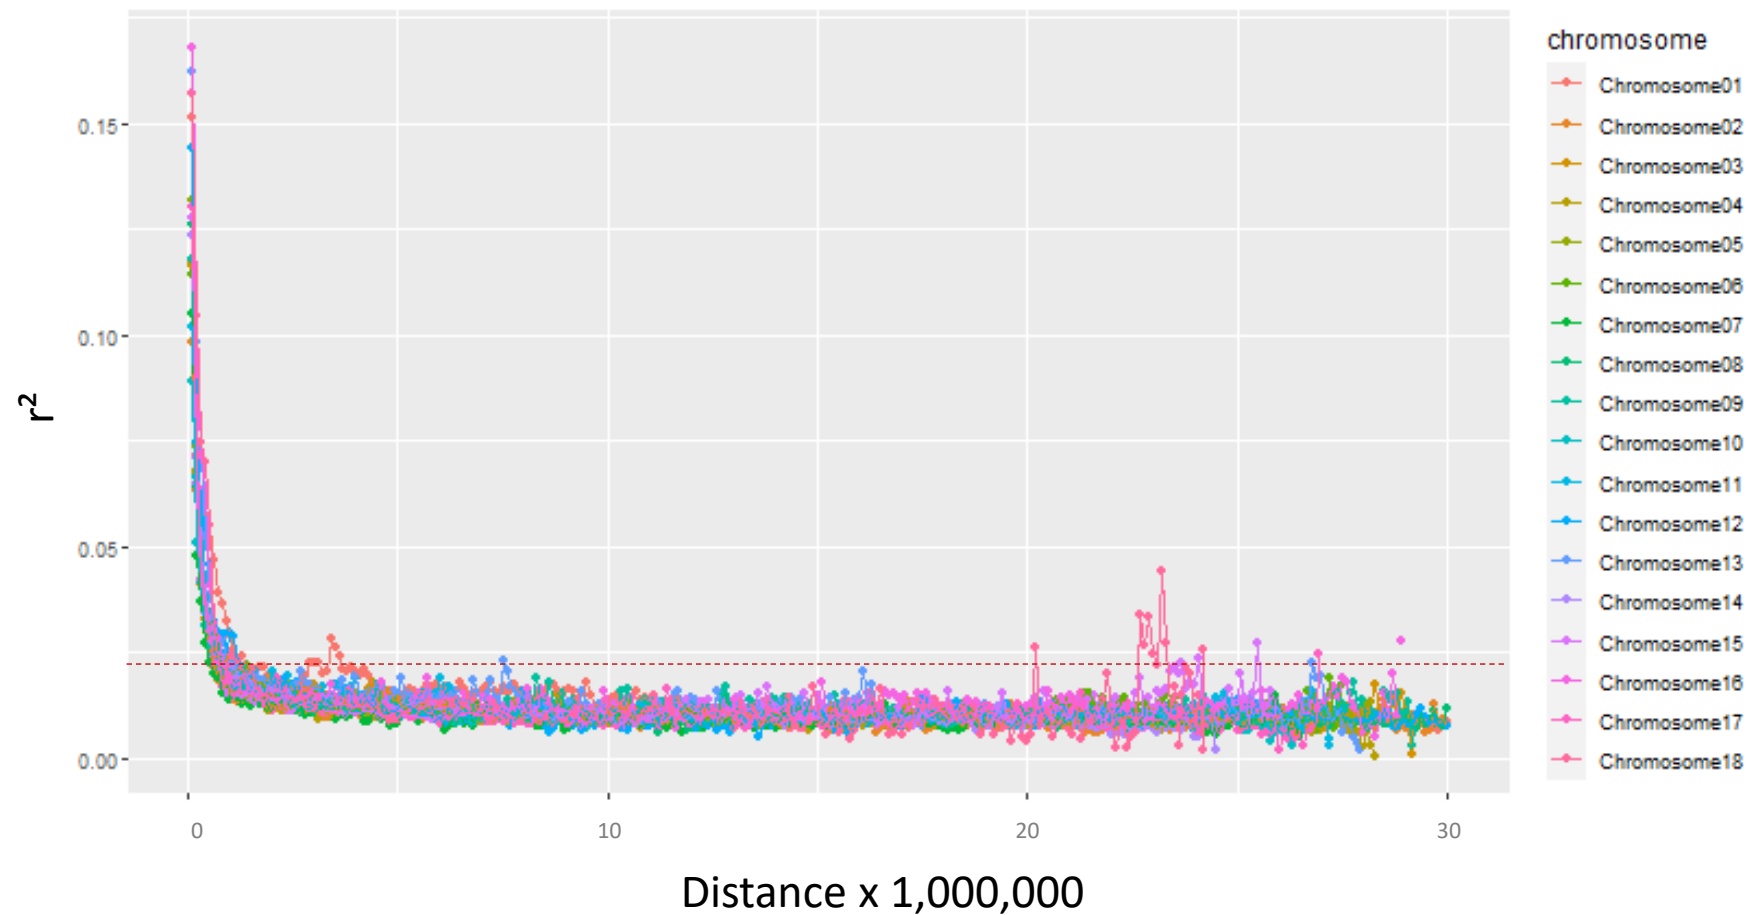

**Supplementary Figure 2.** Genome-wide linkage disequilibrium (LD) decay, showing  $r^2$  values plotted against physical distance (Mb) for each chromosome. The dashed line indicates the average genome-wide LD of 0.021.

**A**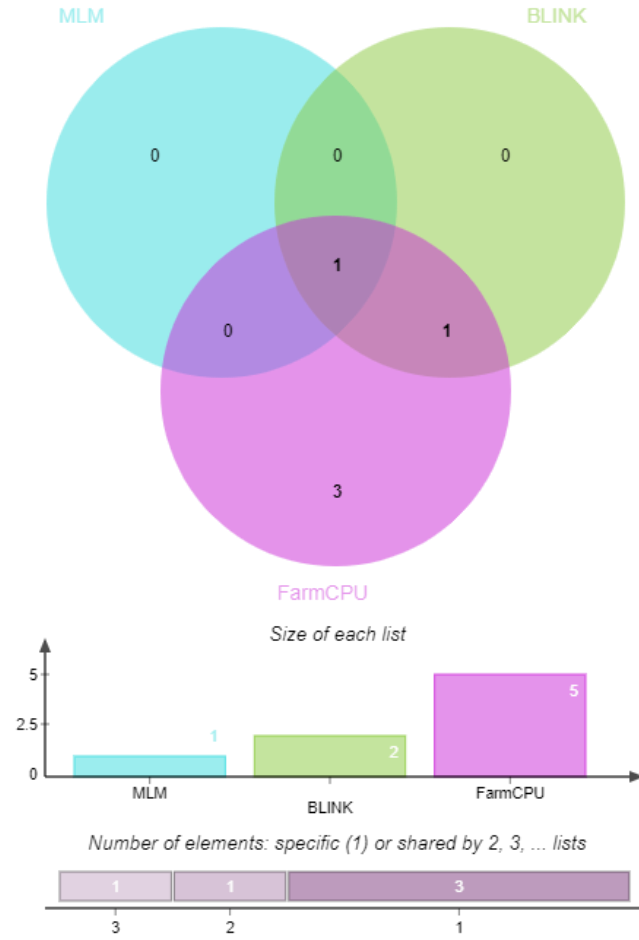**B**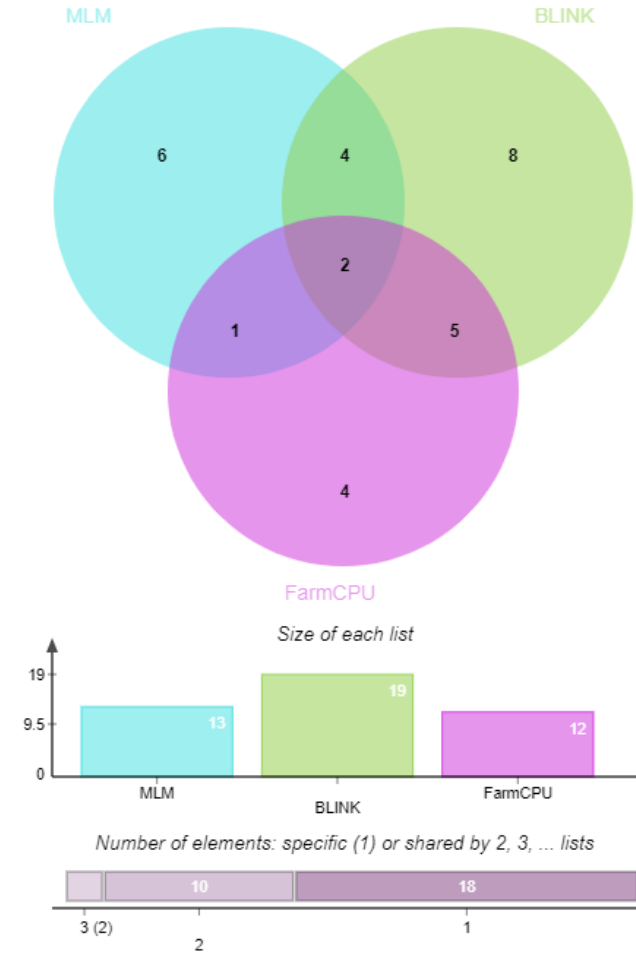

**Supplementary Figure 3.** Venn diagrams showing the total number of significant associations identified by each model and the common ones. **(A)** significant associations identified with the CBSD severity phenotype, and **(B)** with the presence/absence of CBSV infection phenotype.

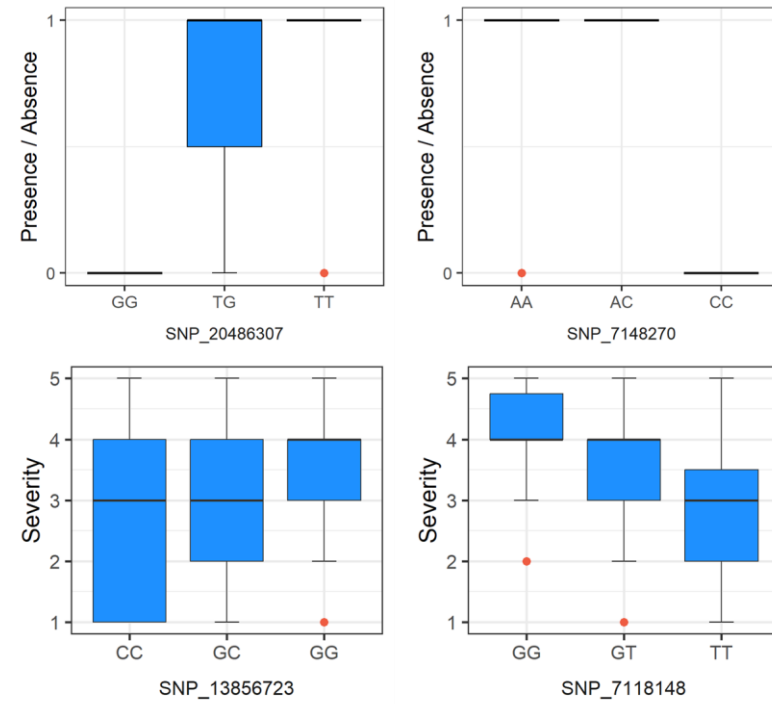

**Supplementary Figure 4.** Phenotypic distribution of the four significant markers. Above the two selected from the presence/absence of virus phenotype, and below the two for CBSD severity phenotype.
